# Supplementary material for: BCL-XL inhibitors enhance the apoptotic efficacy of BRAF inhibitors in BRAFV600E colorectal cancer
Source: PubMed Central journal article supplement (PMC10907349; doi:10.1038/s41419-024-06478-z), 2024-03-01

Figure 1D – Full size western blot

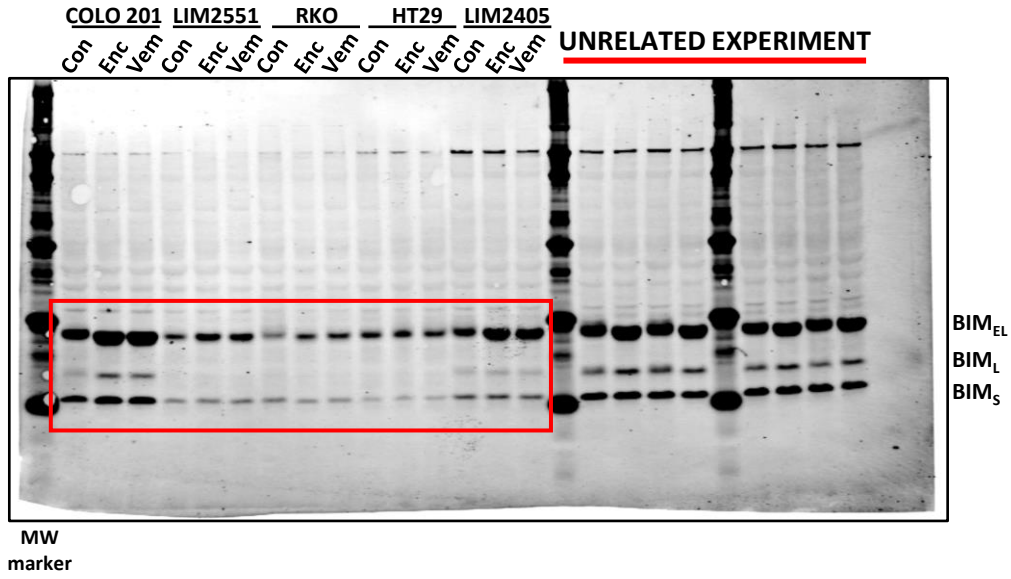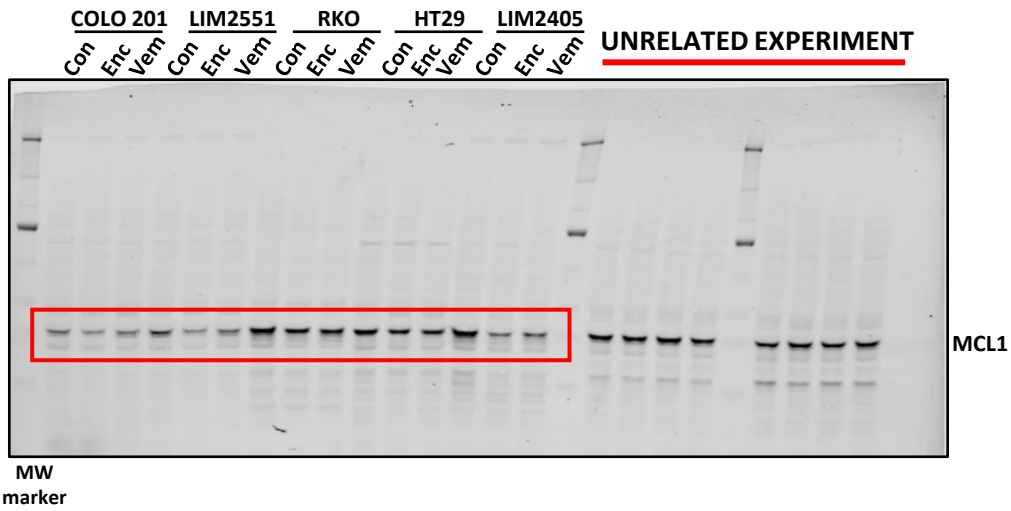

Figure 1D – Full size western blot

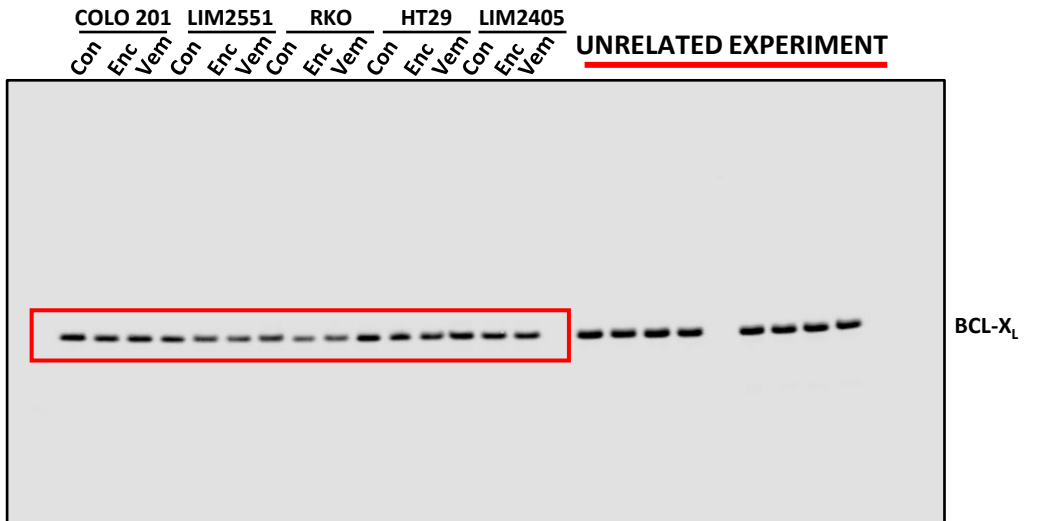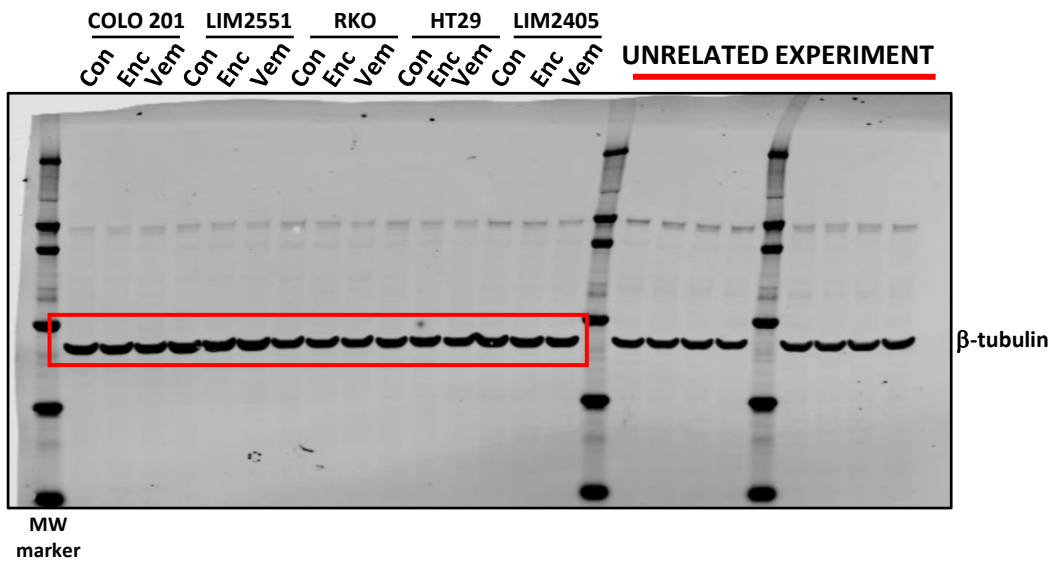

Figure 1E – Full size western blot

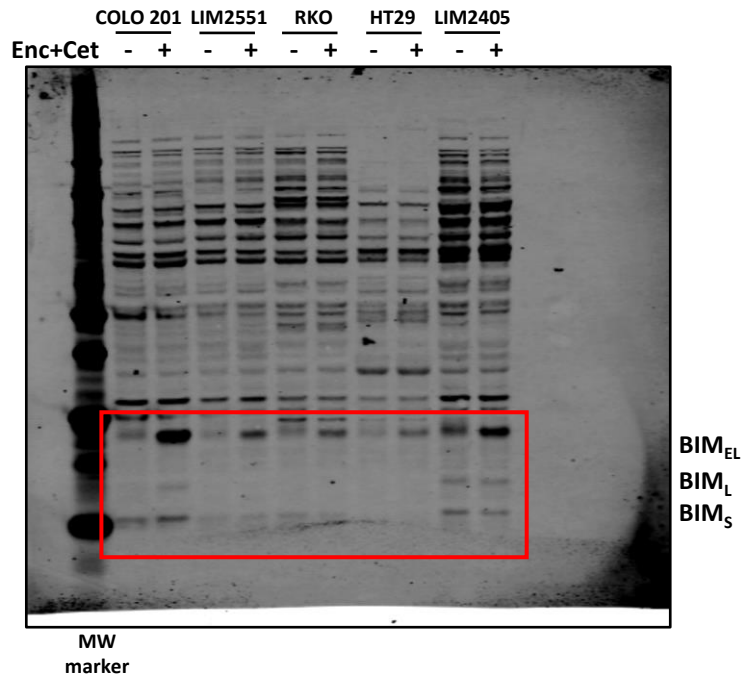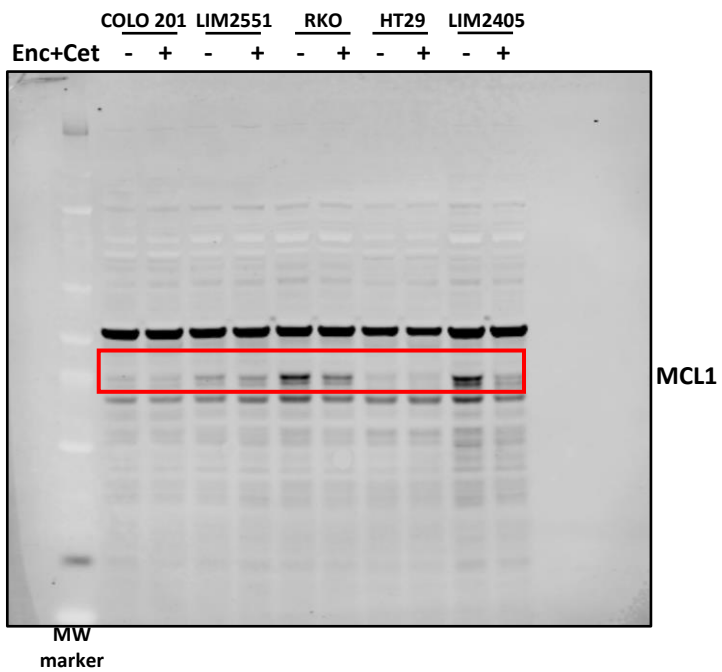

Figure 1E – Full size western blot

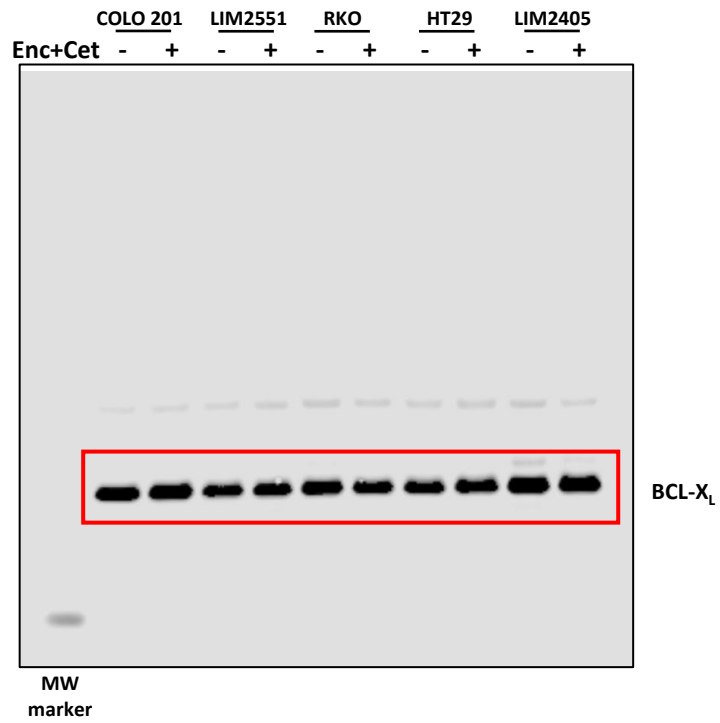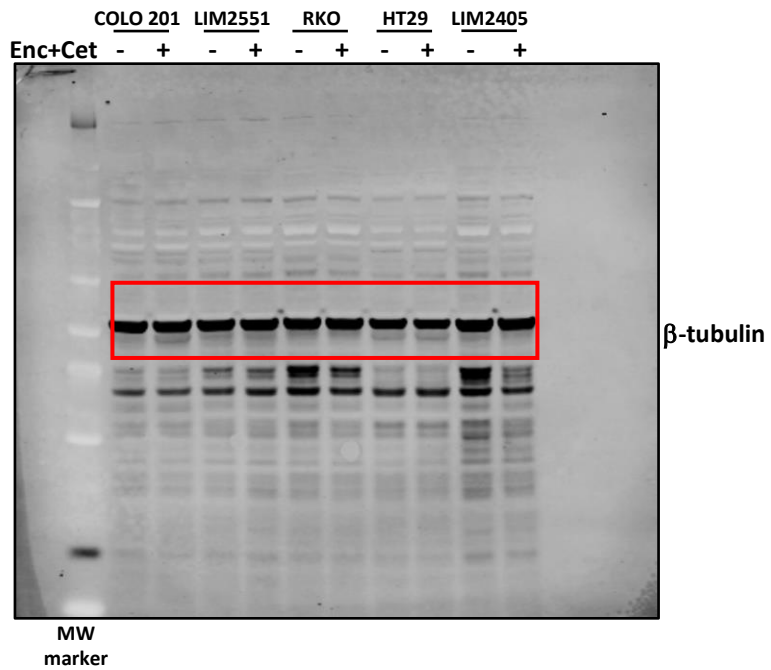

Figure 4A – Full size western blot

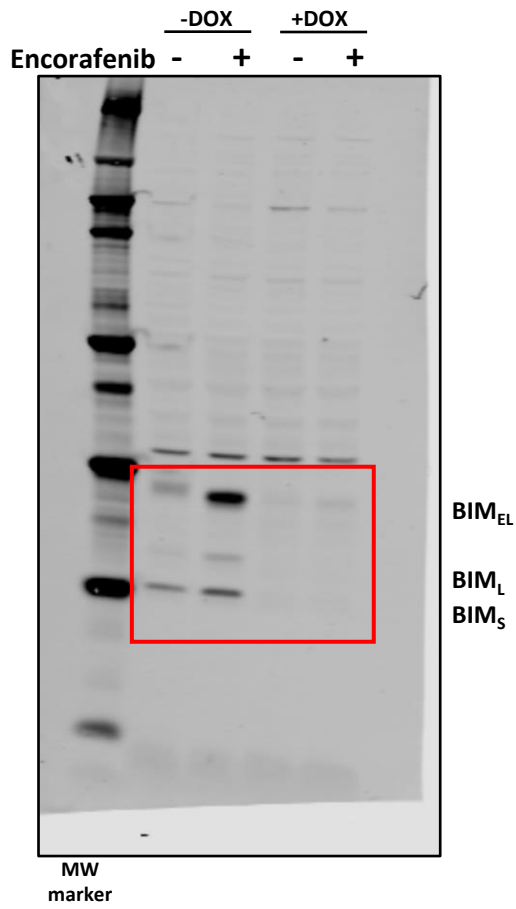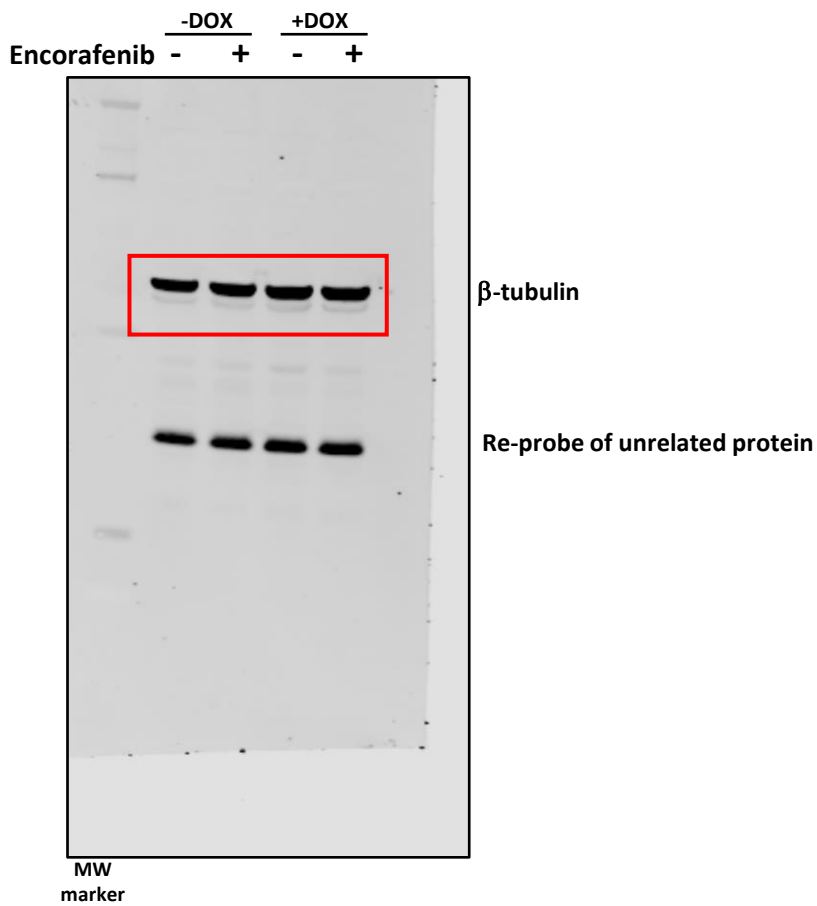

Figure 4C – Full size western blot

|             | - DOX |   |   |   | + DOX |   |   |   |
|-------------|-------|---|---|---|-------|---|---|---|
| Encorafenib | -     | + | - | + | -     | + | - | + |
| A-1331852   | -     | - | + | + | -     | - | + | + |

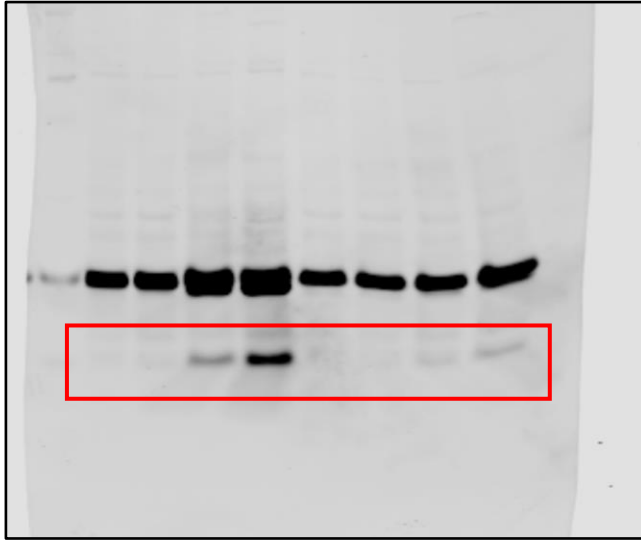

Re-probe of unrelated protein

Cleaved Caspase 3

MW  
marker

|             | - DOX |   |   |   | + DOX |   |   |   |
|-------------|-------|---|---|---|-------|---|---|---|
| Encorafenib | -     | + | - | + | -     | + | - | + |
| A-1331852   | -     | - | + | + | -     | - | + | + |

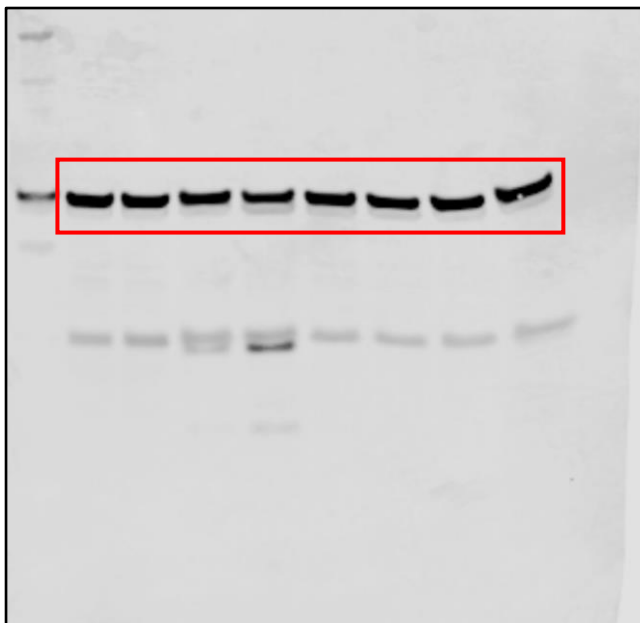

$\beta$ -tubulin

MW  
marker

Figure 5A – Full size western blot

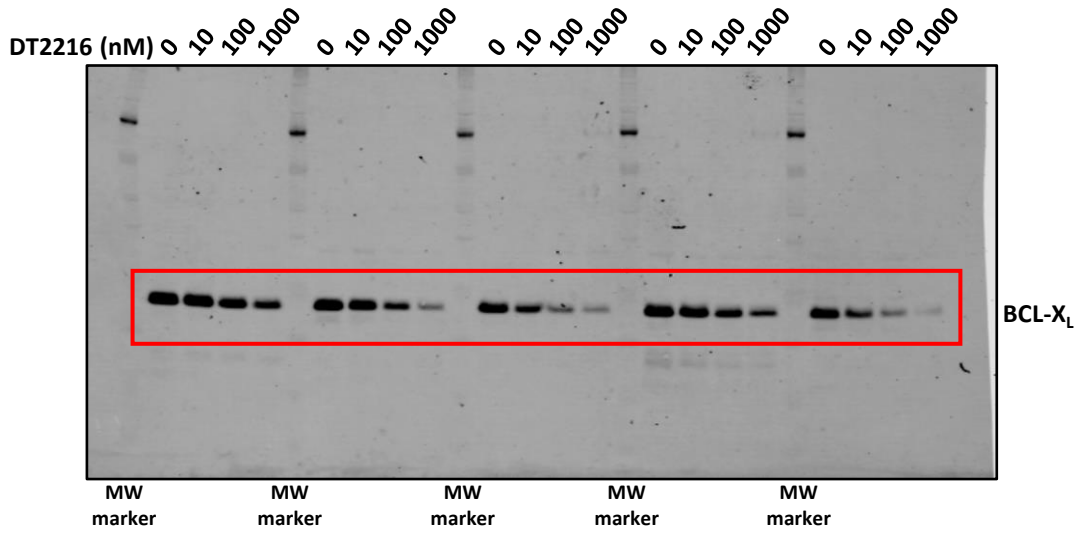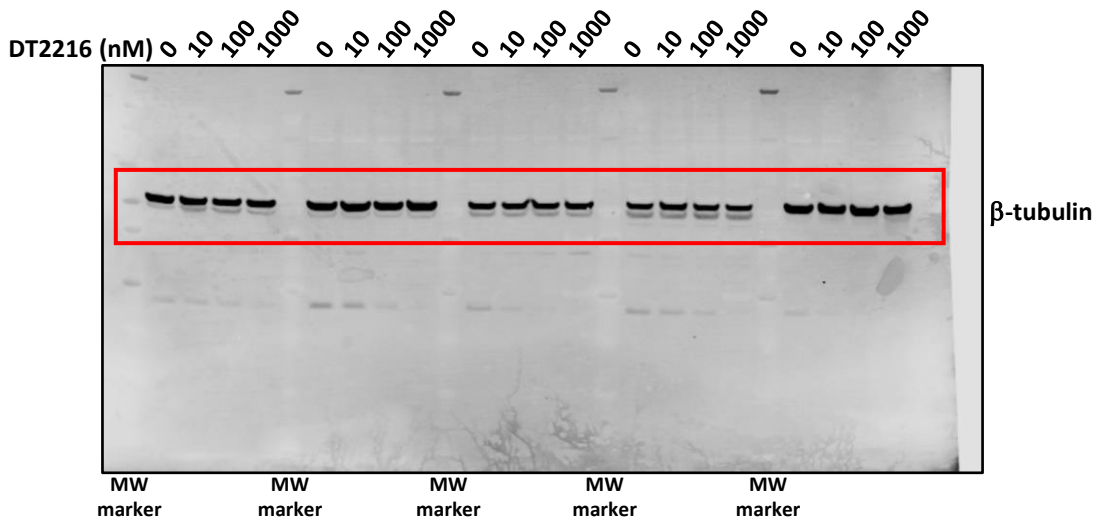

# Supplementary Figure 5A – Full size western blot

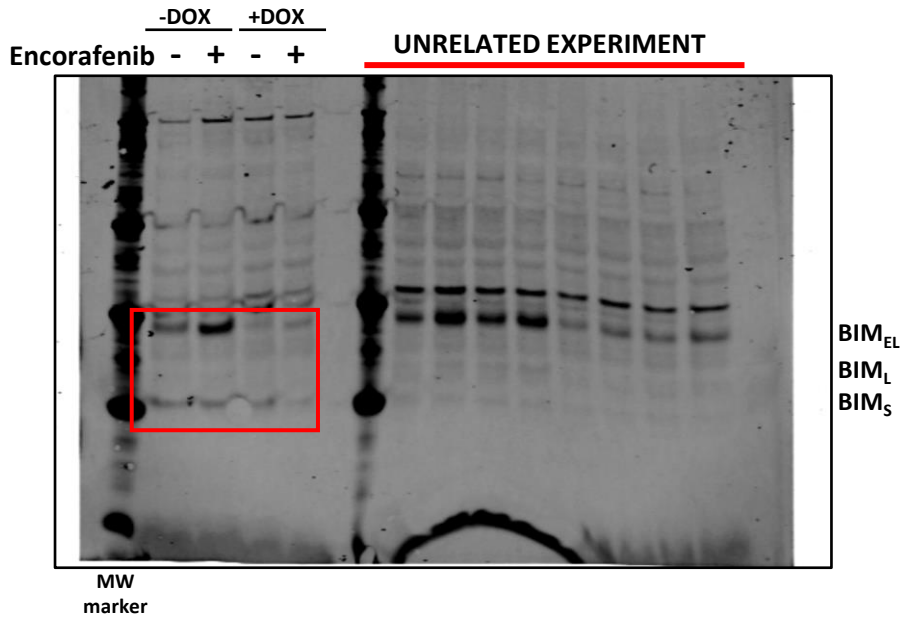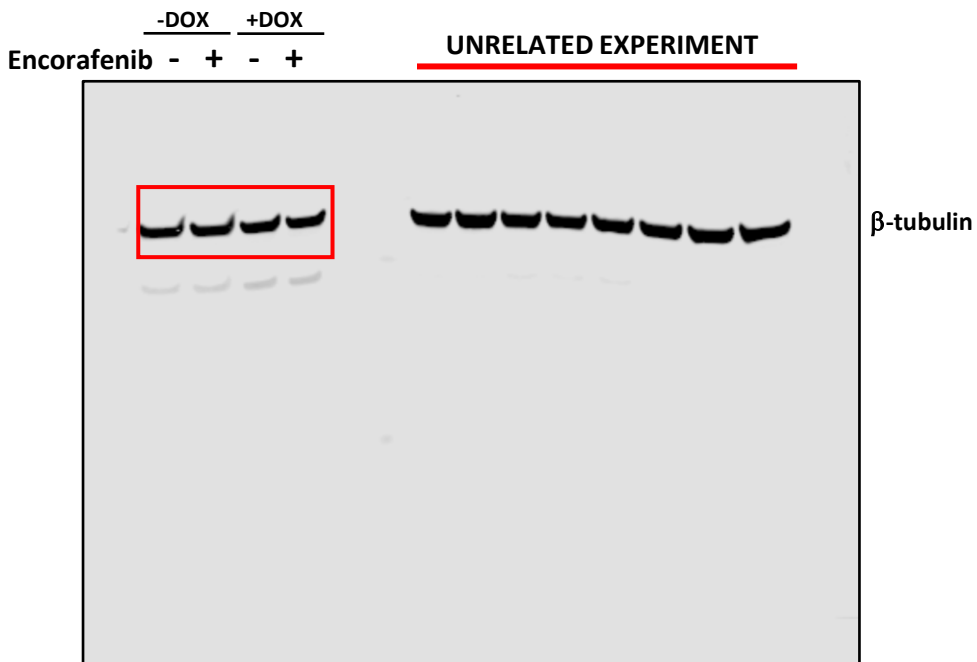

Supplement: 41419_2024_6478_MOESM7_ESM.pdf [file 41419_2024_6478_MOESM7_ESM.pdf]
